# Supplementary material for: A bio-inspired silkworm 3D cocoon-like hierarchical self-assembled structure from π-conjugated natural aromatic amino acids
Source: Royal Society of Chemistry journal article supplement (doi:10.1039/d3sm01746j), 2024-01-01
Supplement: d3sm01746j1.pdf [file d3sm01746j1.pdf]

## Supporting Information

# **Bio-Inspired Silkworm 3D Cocoon-like Hierarchical Self-assembled Structure from $\pi$ -conjugated Natural Aromatic Amino Acids**

Smriti Mukherjee,<sup>1,2</sup> Samala Murali Mohan Reddy,<sup>1</sup> Ganesh Shanmugam<sup>\*1,2</sup>

<sup>1</sup>Organic & Bioorganic Chemistry Laboratory  
Council of Scientific and Industrial Research (CSIR) - Central Leather Research Institute  
(CLRI), Adyar, Chennai, 600020, India.

<sup>2</sup>Academy of Scientific and Innovative Research (AcSIR), Ghaziabad-201002, India.

### **Table of contents**

| <b>Contents</b>                                                                                | <b>Page No.</b> |
|------------------------------------------------------------------------------------------------|-----------------|
| Figure S1. FE-SEM images of Fmoc-F and Fmoc-Y cocoon-like structures                           | <b>2</b>        |
| Figure S2. Excitation spectra of Fmoc-F and Fmoc-Y fibrils                                     | <b>3</b>        |
| Figure S3. ECD spectra of Fmoc-F and Fmoc-Y fibrils                                            | <b>4</b>        |
| Figure S4. Vibrational absorption and VCD spectra of Fmoc-F and Fmoc-Y fibrils                 | <b>5</b>        |
| Figure S5. Time-lapse optical microscopic images (40X) of Fmoc-F fibrils forming during drying | <b>6</b>        |
| Figure S6. Time-lapse optical microscopic images (40X) of Fmoc-Y fibrils forming during drying | <b>7</b>        |
| Figure S7. Water contact angle of the Fmoc-F and Fmoc-Y fibrils-coated glass surface           | <b>8</b>        |

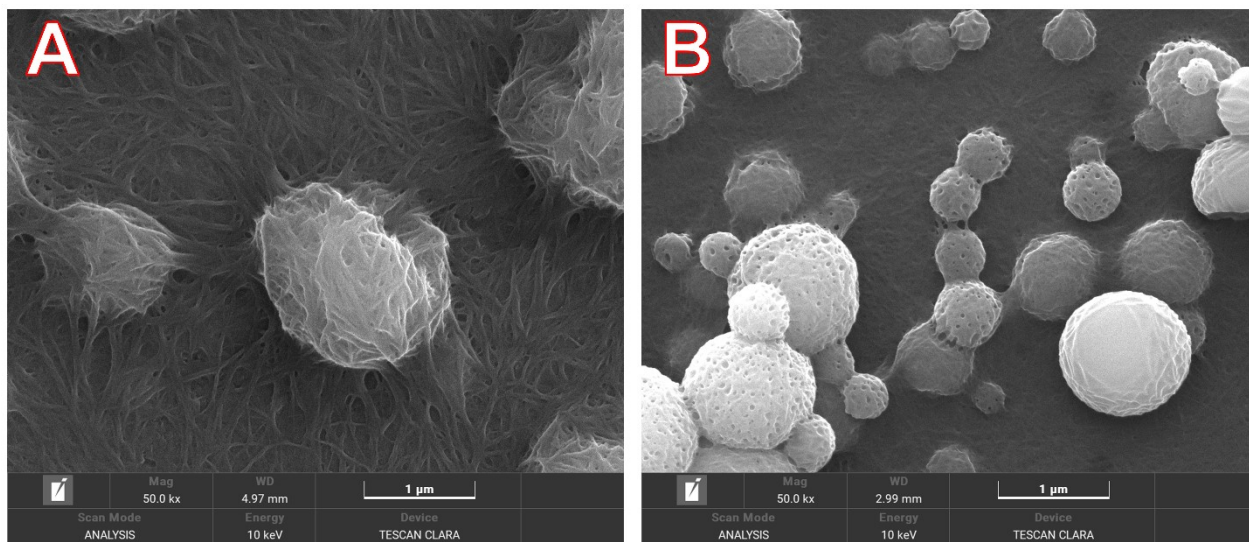

**Figure S1.** Additional FE-SEM images of (A) Fmoc-F and (B) Fmoc-Y cocoon-like structures formed on drying at 30 °C and 27% RH. The cocoon-like structures are composed of entangled fibrils.

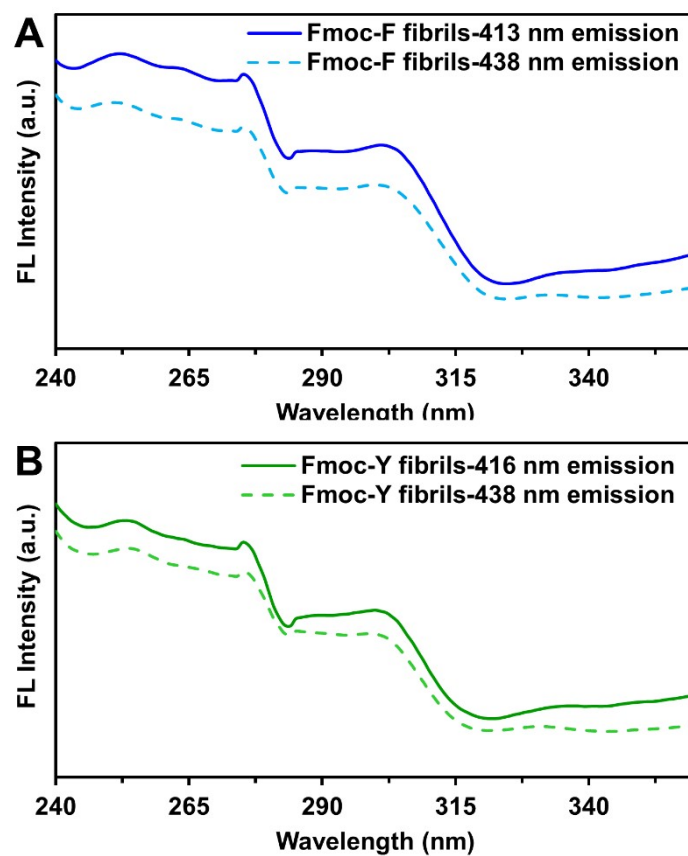

**Figure S2.** Excitation spectra of (A) Fmoc-F and (B) Fmoc-Y fibrils at two emission wavelengths.

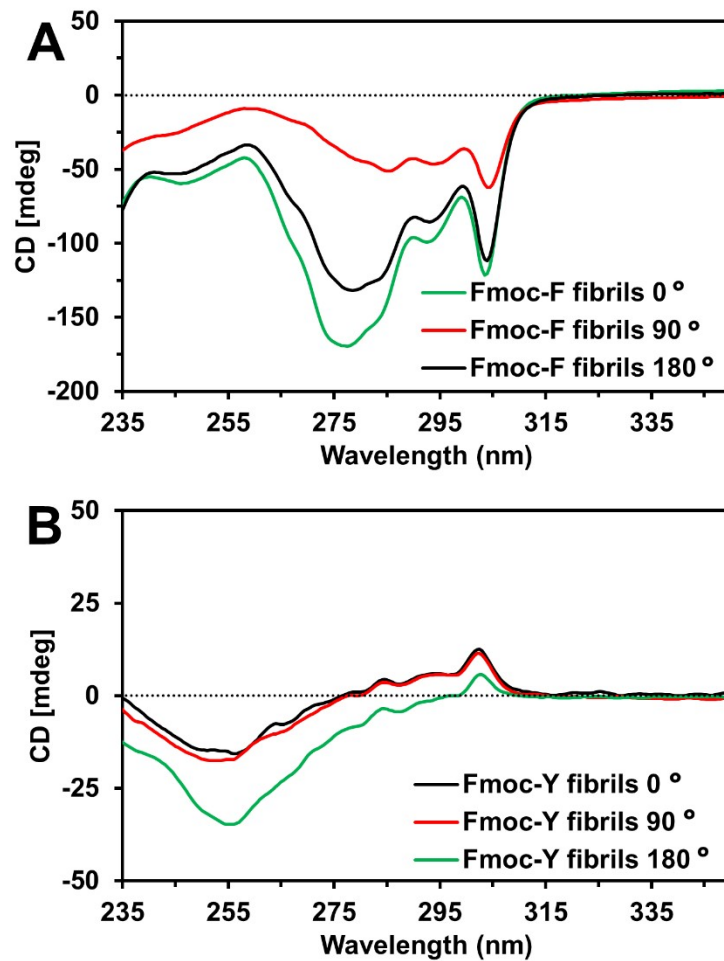

**Figure S3.** ECD spectra of (A) Fmoc-F and (B) Fmoc-Y fibrils, formed on the quartz slide, at different angles (0°, 90° and 180°) with respect to the light beam axis.

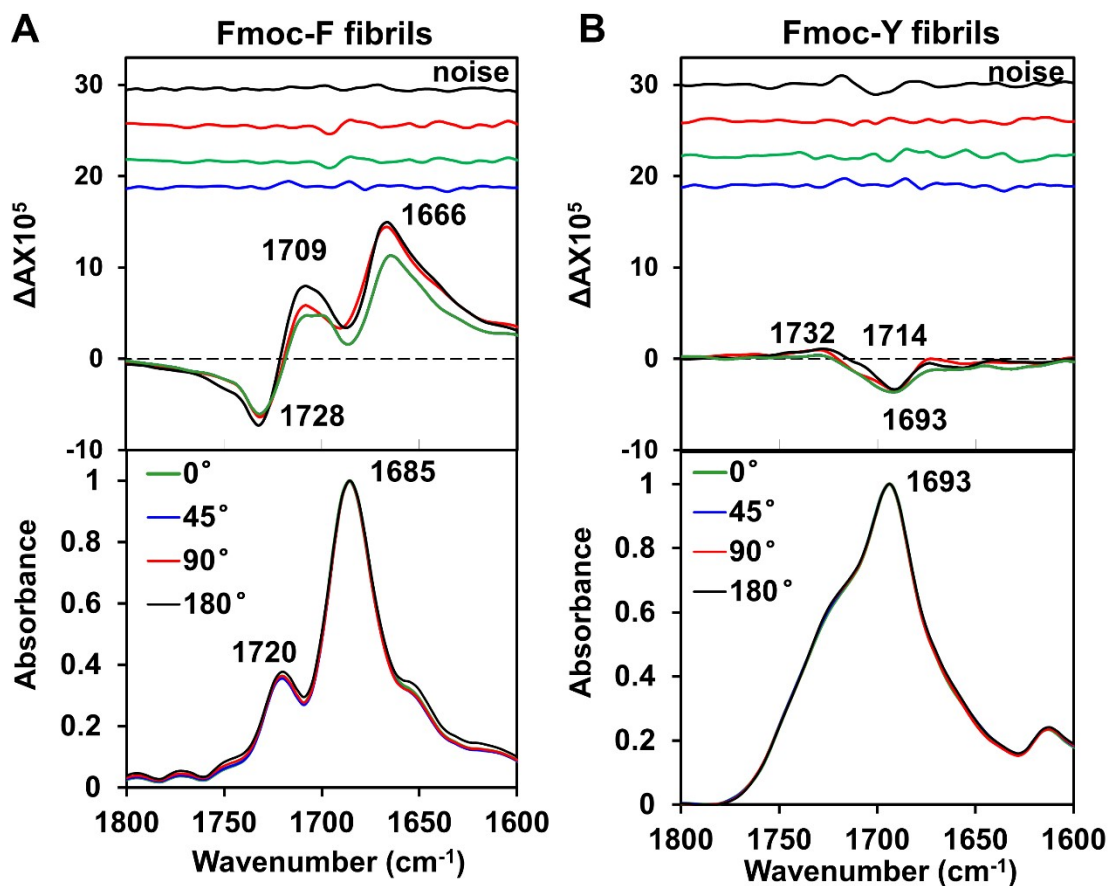

**Figure S4.** Vibrational absorption (bottom panel) and VCD (top panel) spectra of (A) Fmoc-F and (B) Fmoc-Y fibrils (supported on CaF<sub>2</sub> plate) obtained from different rotations ( 0°, 45°, 90° and 180° ) around the light beam axis.

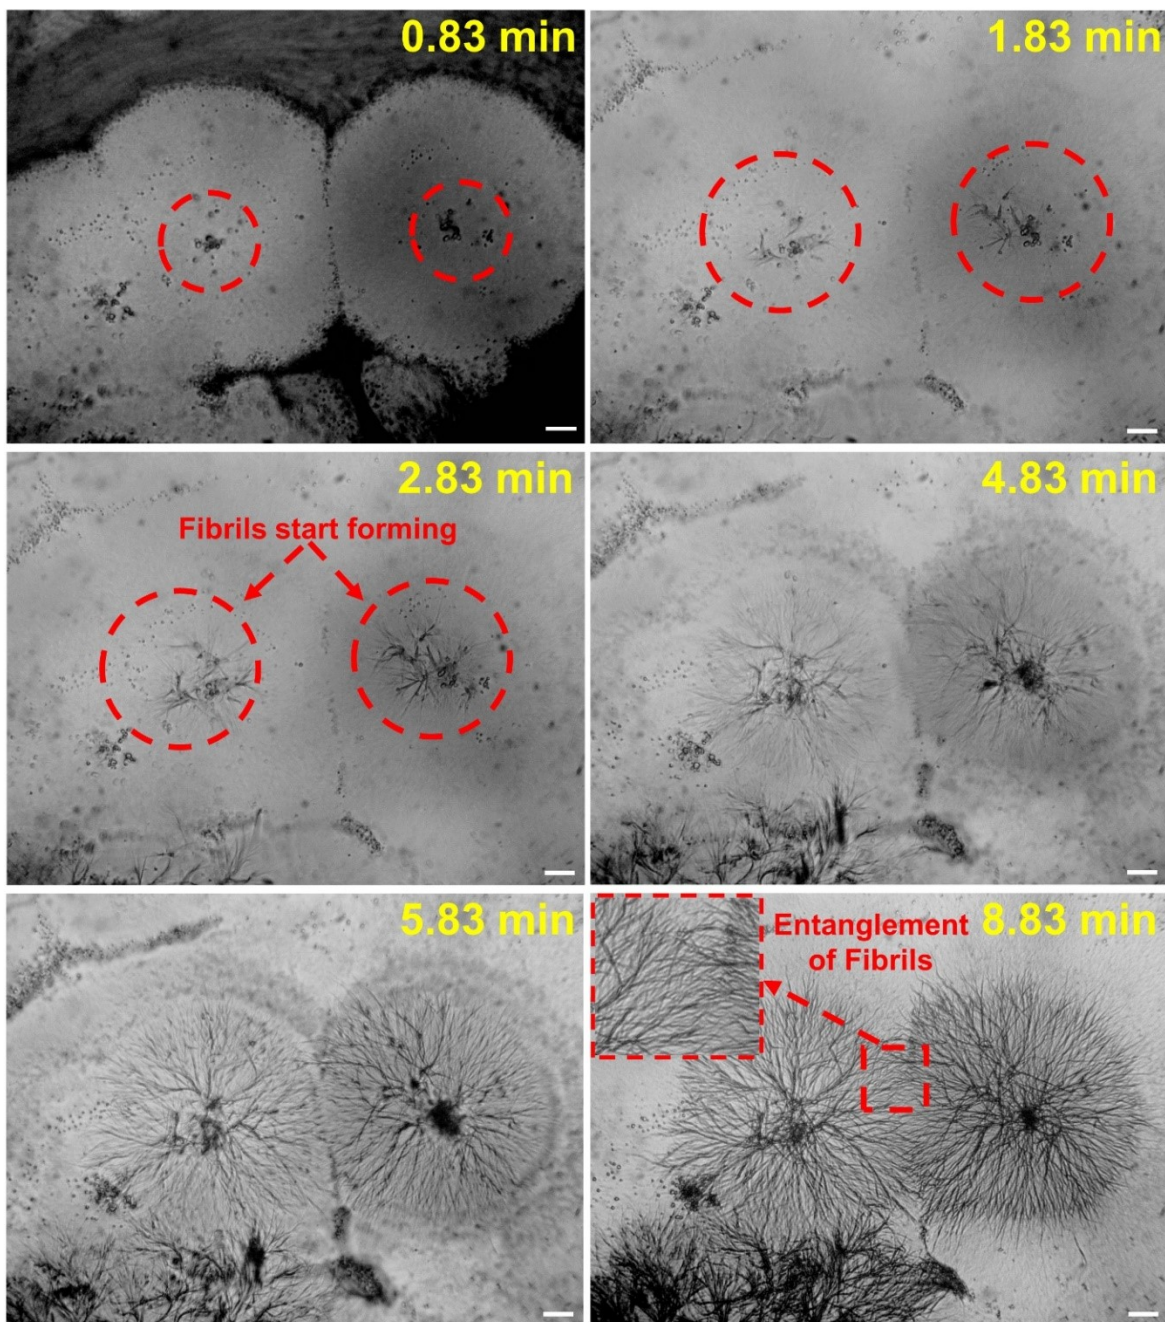

**Figure S5.** Time-lapse optical microscopic images (40X) of Fmoc-F fibrils forming during drying from a 2 mg/mL solution in ethanol (Scale bar = 10  $\mu\text{m}$ ). The rate of evaporation is slower here than in confocal laser scanning microscopy since the optical microscopy experiment was conducted in a closed environment with less air circulation. It is note that the cocoon-like structures of diameter about 1  $\mu\text{m}$  could not be visualised using an optical microscope due to its own limitation.

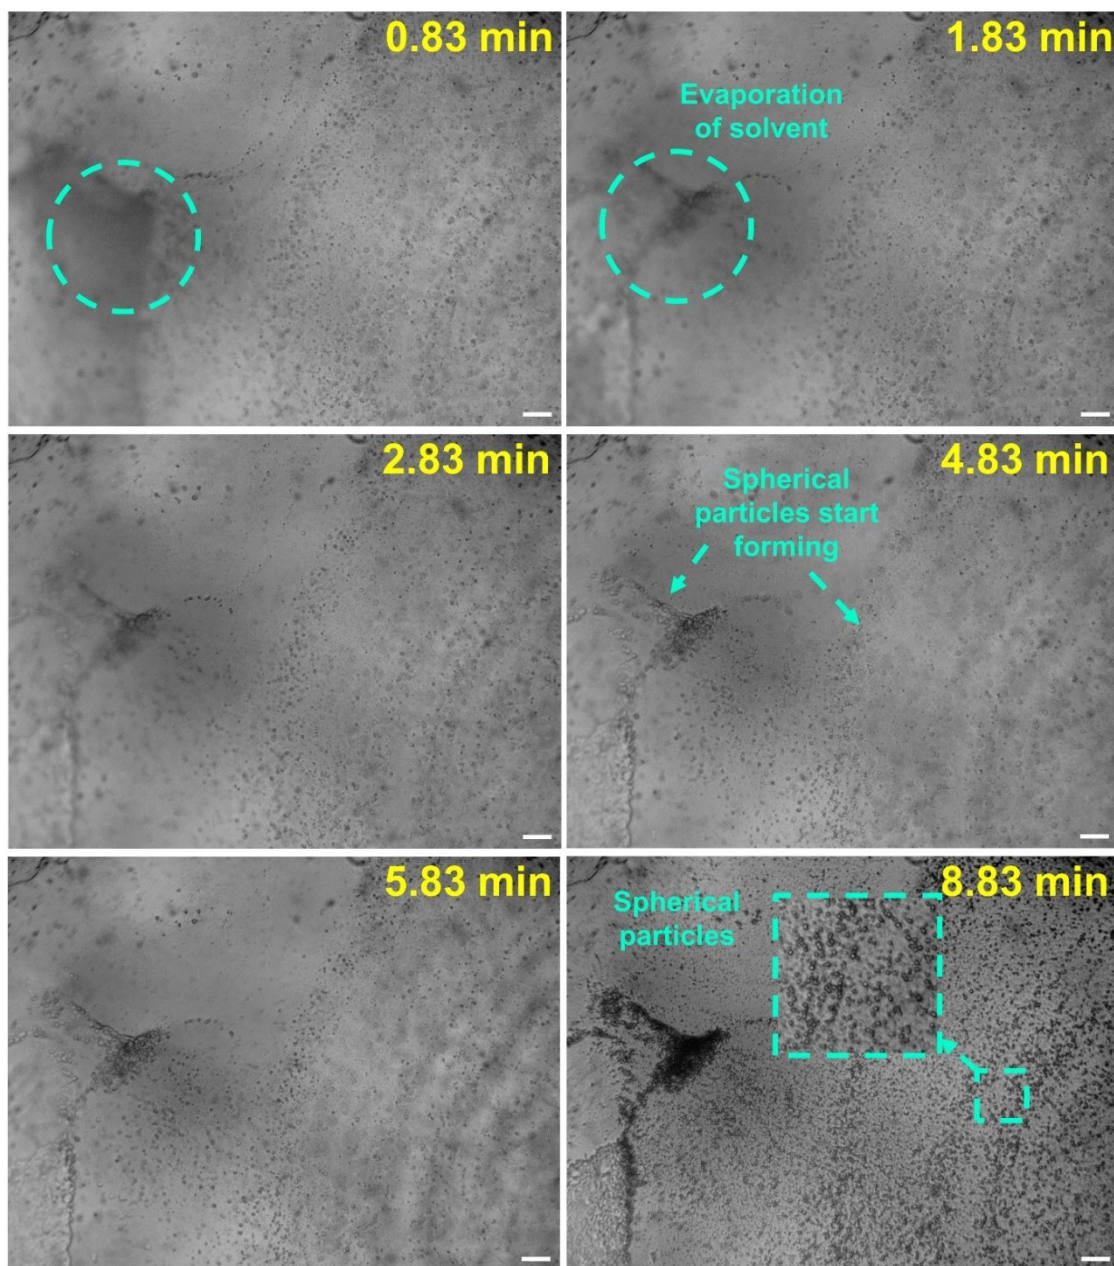

**Figure S6.** Time-lapse optical microscopic images (40X) of Fmoc-Y fibrils forming during drying from a 2 mg/mL solution in ethanol (Scale bar = 10  $\mu\text{m}$ ). The rate of evaporation is slower here than in confocal laser scanning microscopy since the optical microscopy experiment was conducted in a closed environment with less air circulation. Due to the low resolution of optical microscope, the smaller diameter Fmoc-Y fibrils could not be visualized. It is note that the cocoon-like structures of diameter about 1  $\mu\text{m}$  could not be visualised using an optical microscope due to its own limitation.

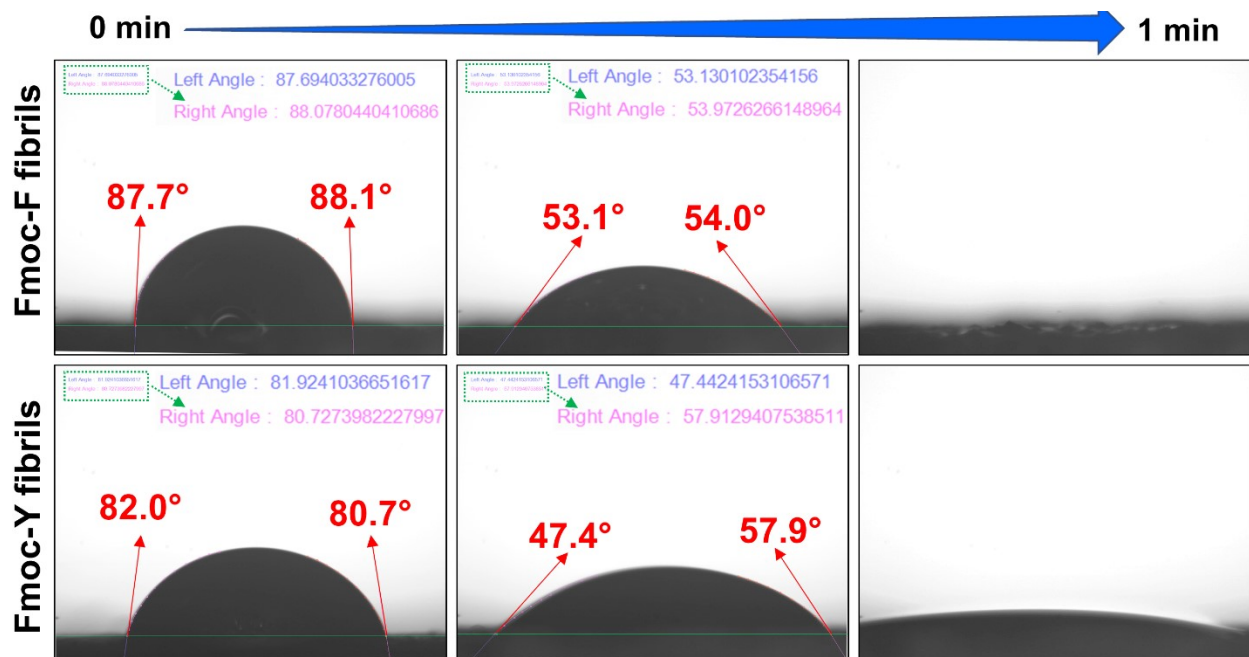

**Figure S7.** Change in water contact angle on Fmoc-F and Fmoc-Y fibrils-coated glass surfaces as a function of time, demonstrating that water drops spread quickly on the coated glass surfaces. The left and right water contact angles are highlighted on the images in red.
